# Supplementary figures and images for: Exploring Quantitative Metagenomics Studies Using Oxford Nanopore Sequencing: A Computational and Experimental Protocol
Source: Preprints.org preprint supplement (doi:10.20944/preprints202108.0104.v1), 2021-08-04

Additional file S8

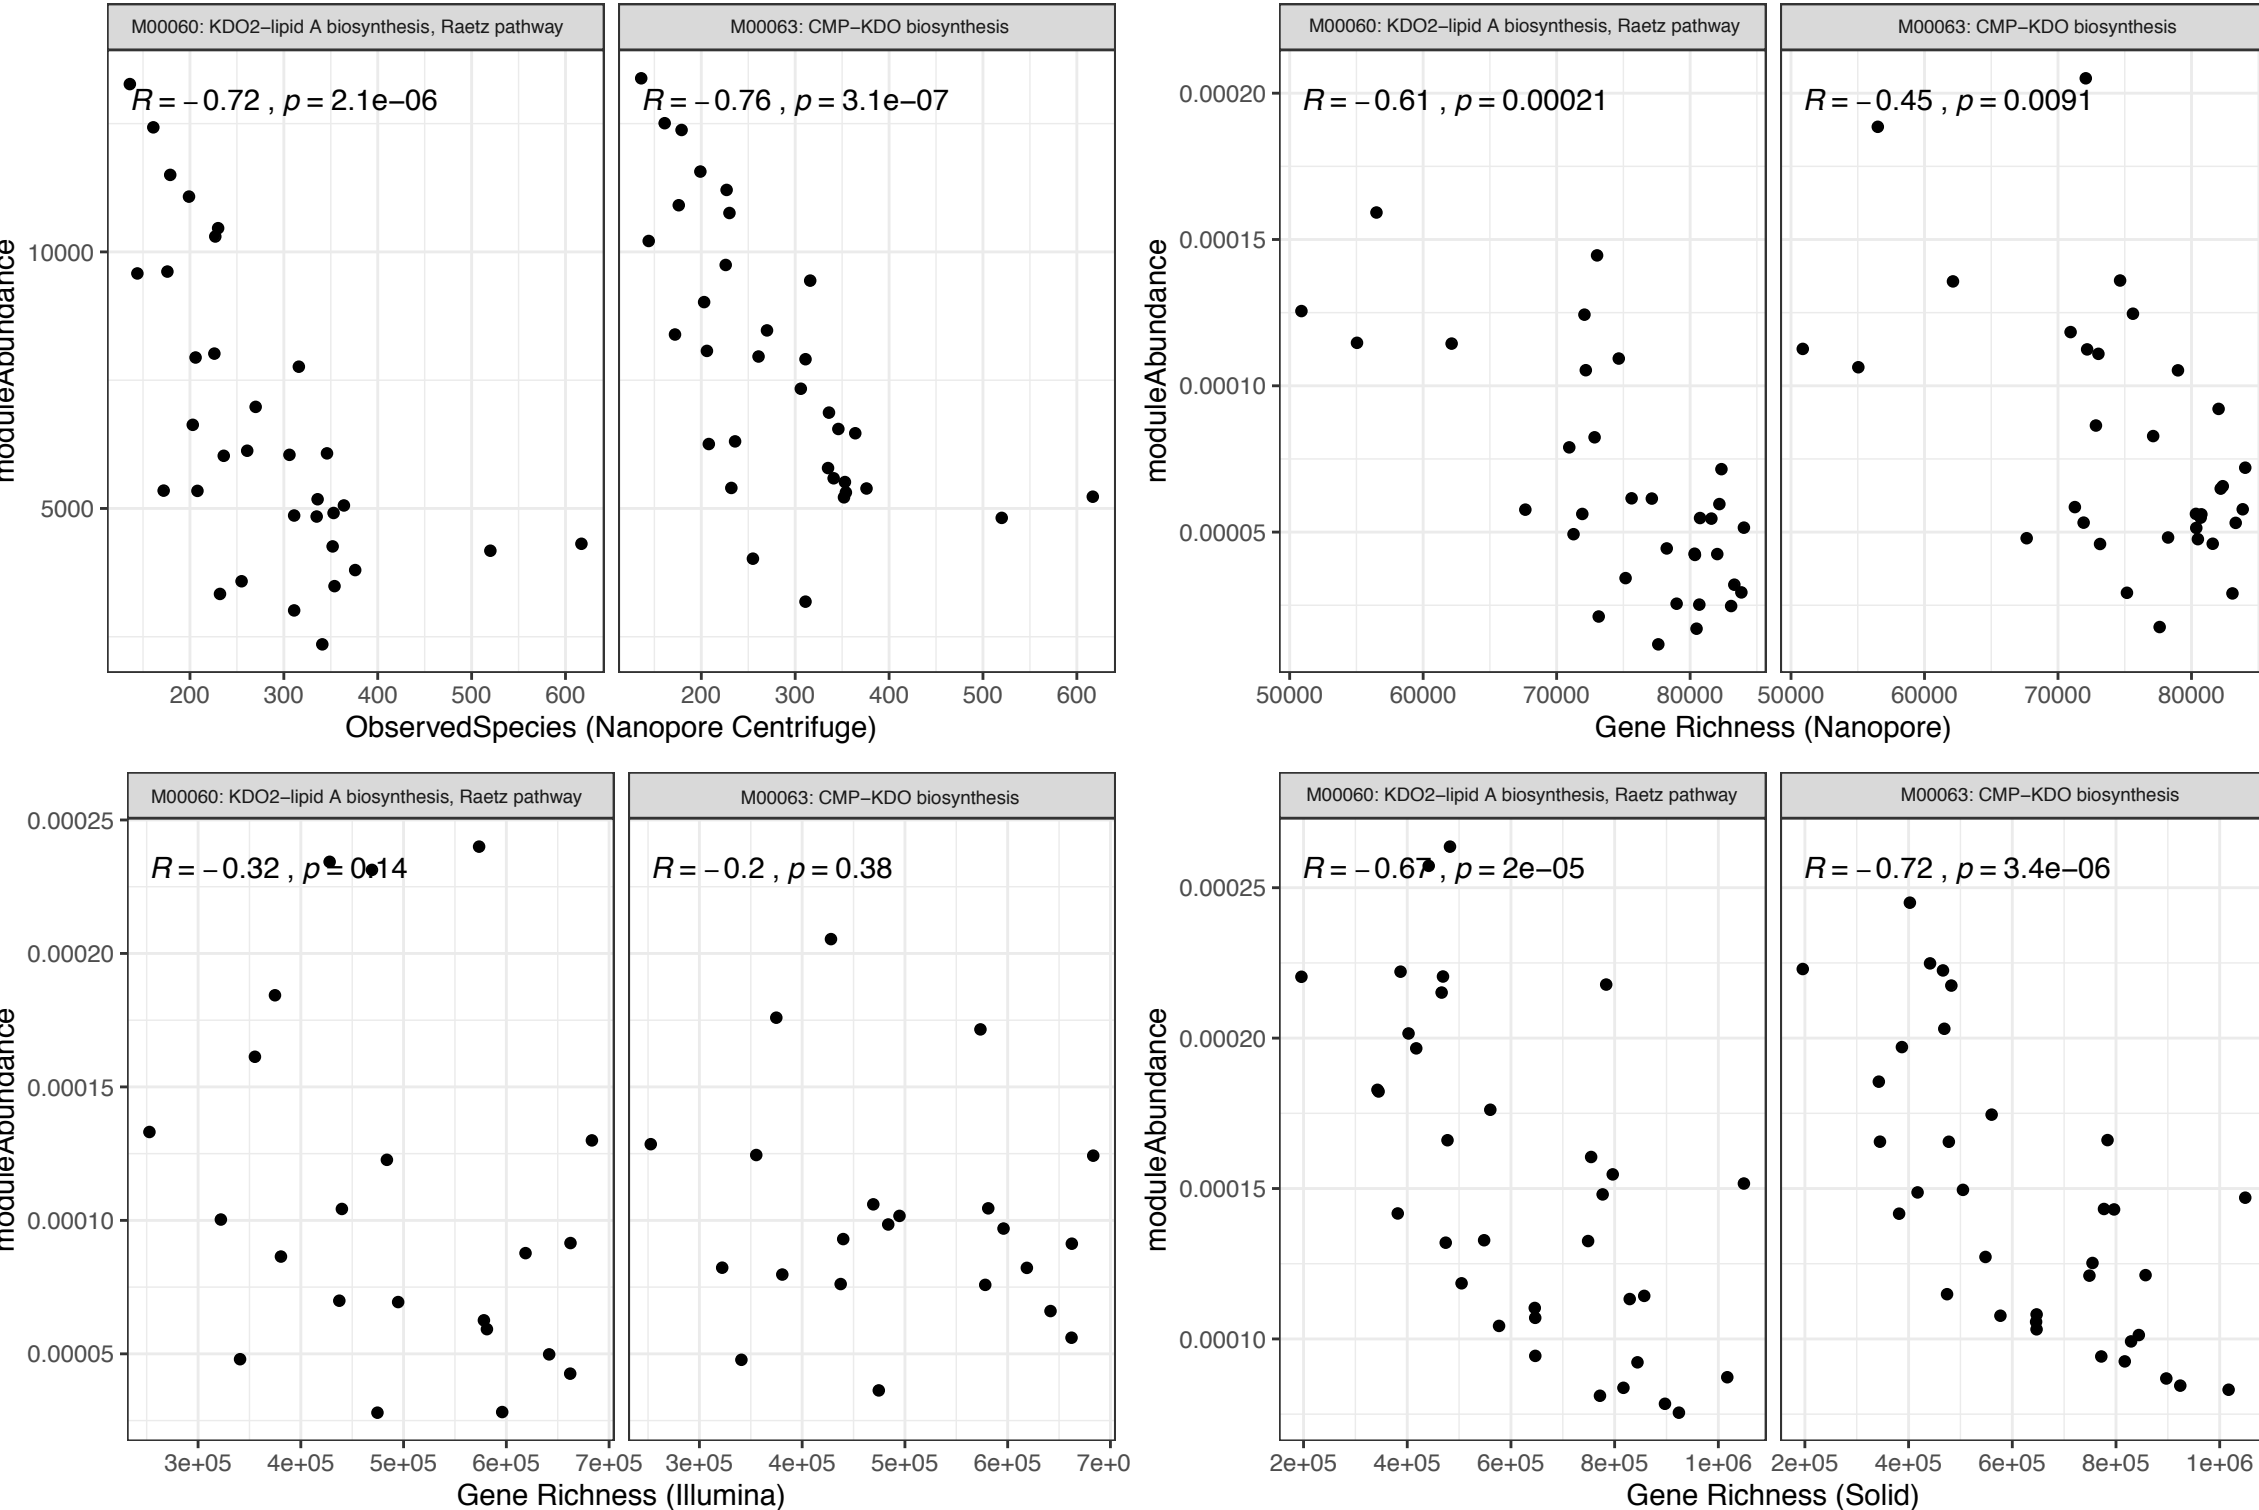

Supplement: Supplementary file 2 [file supplementary]

Additional file S2

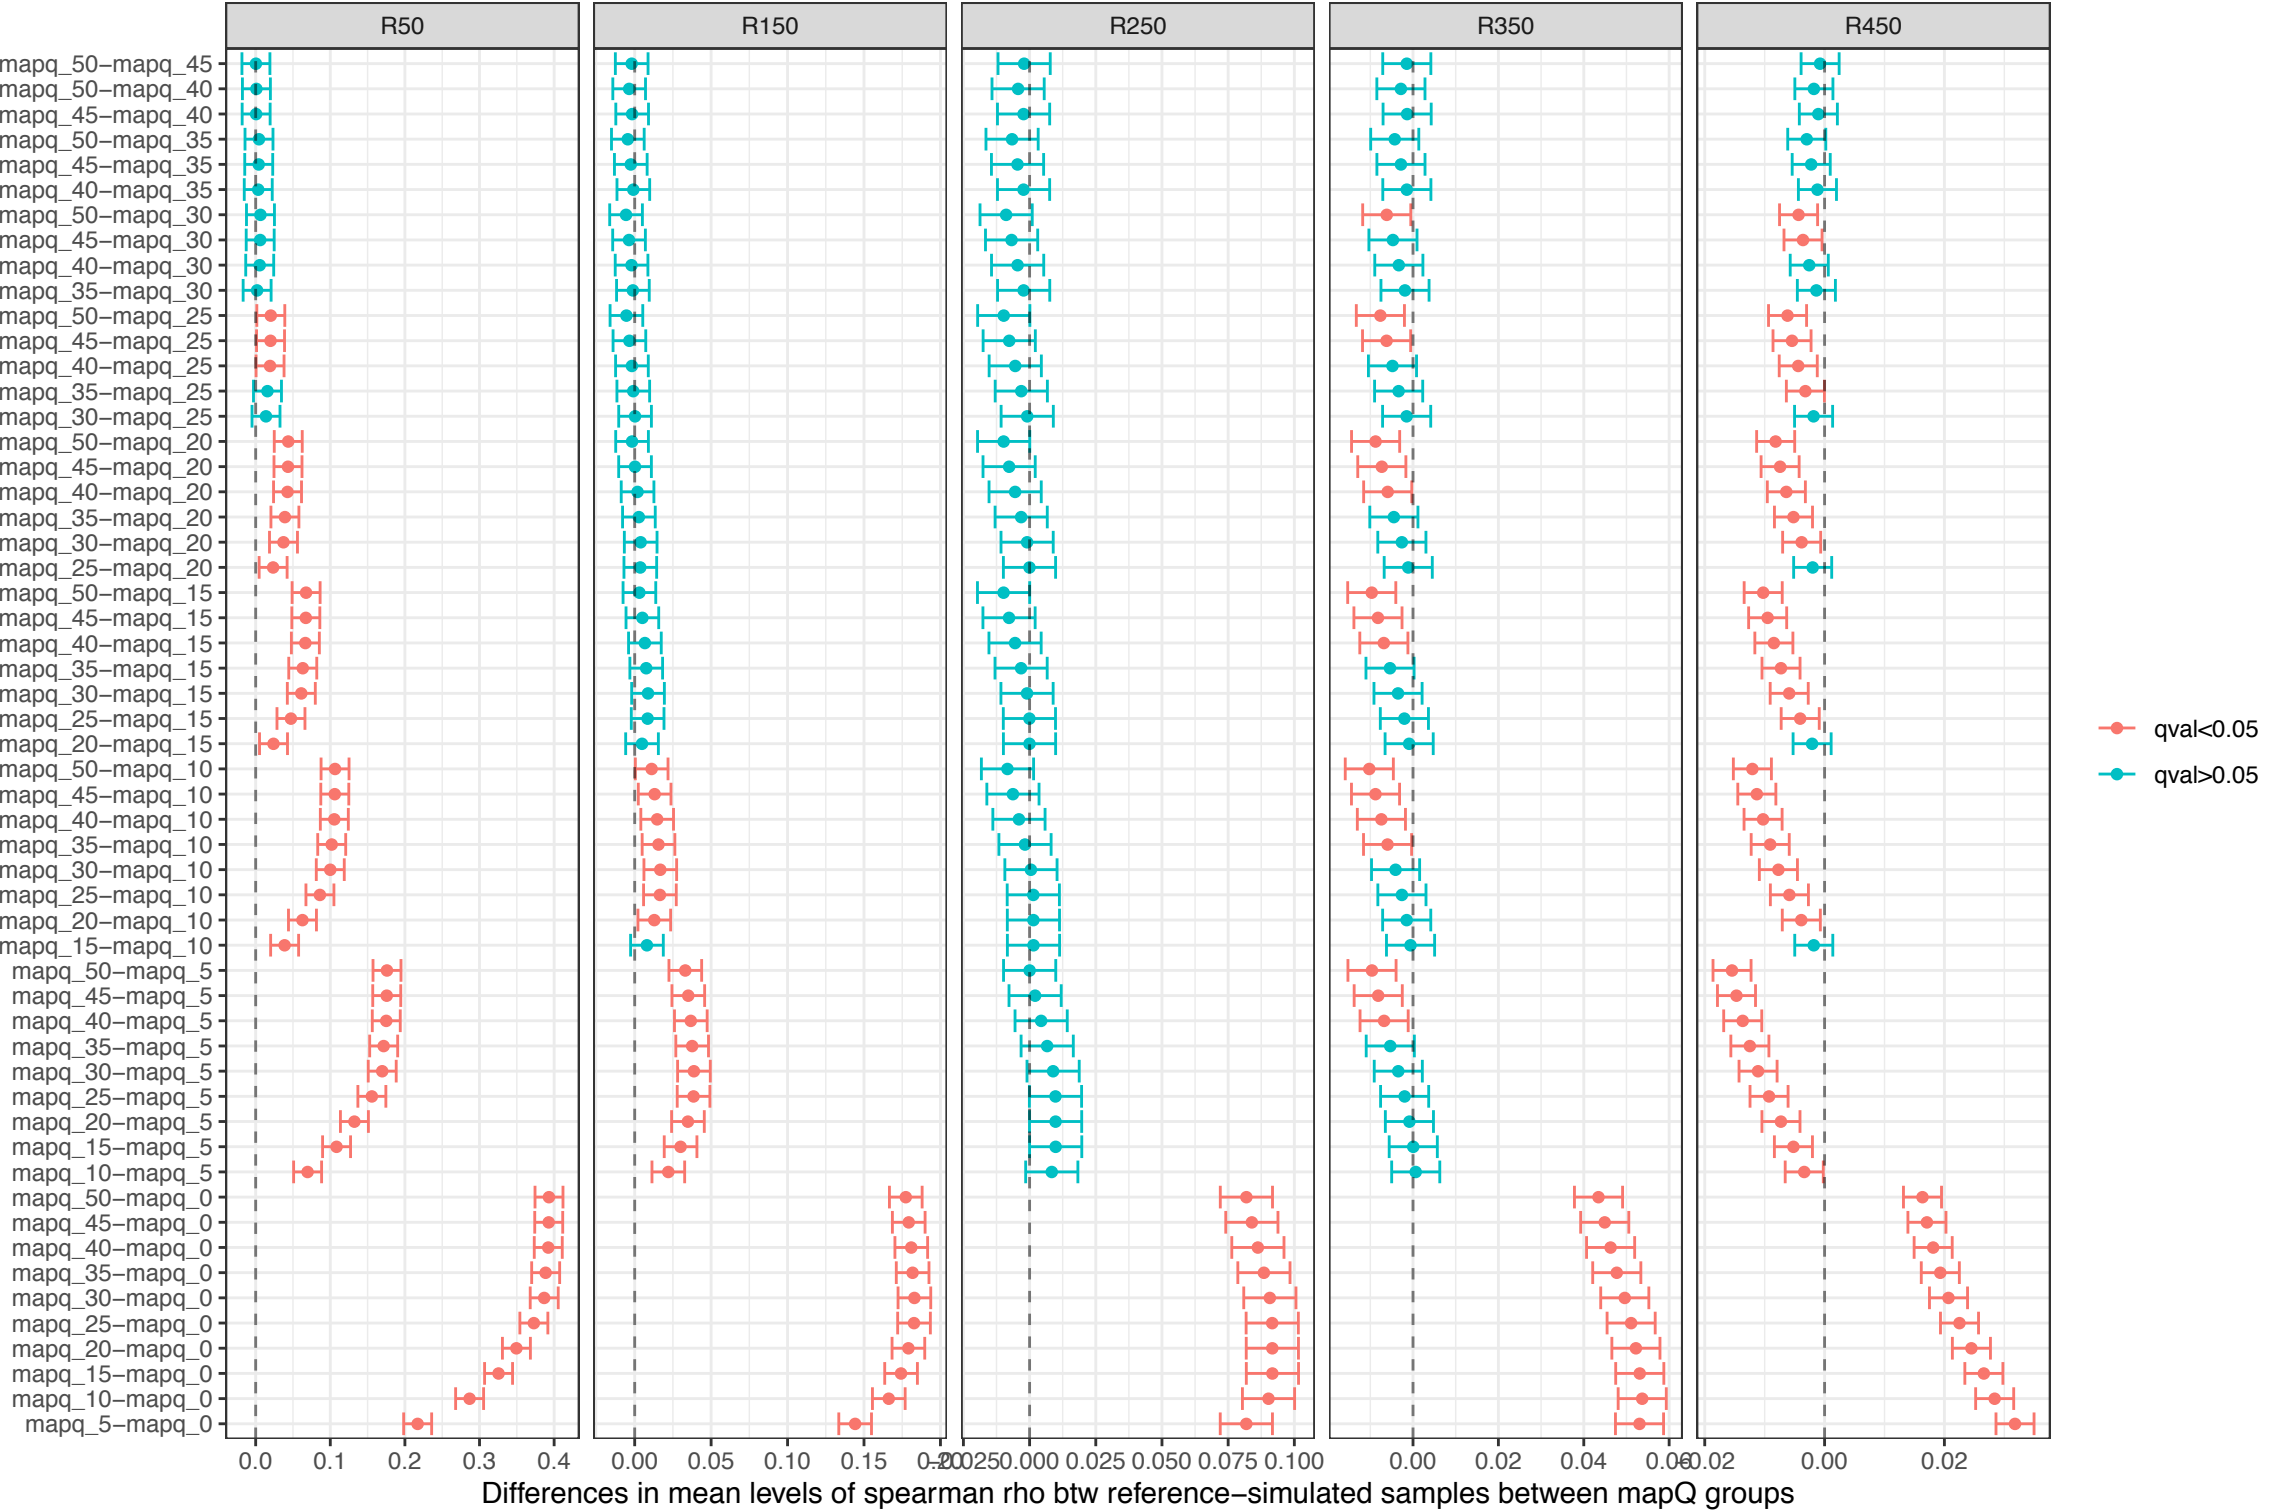

Supplement: Supplementary file 5 [file supplementary]

**a**

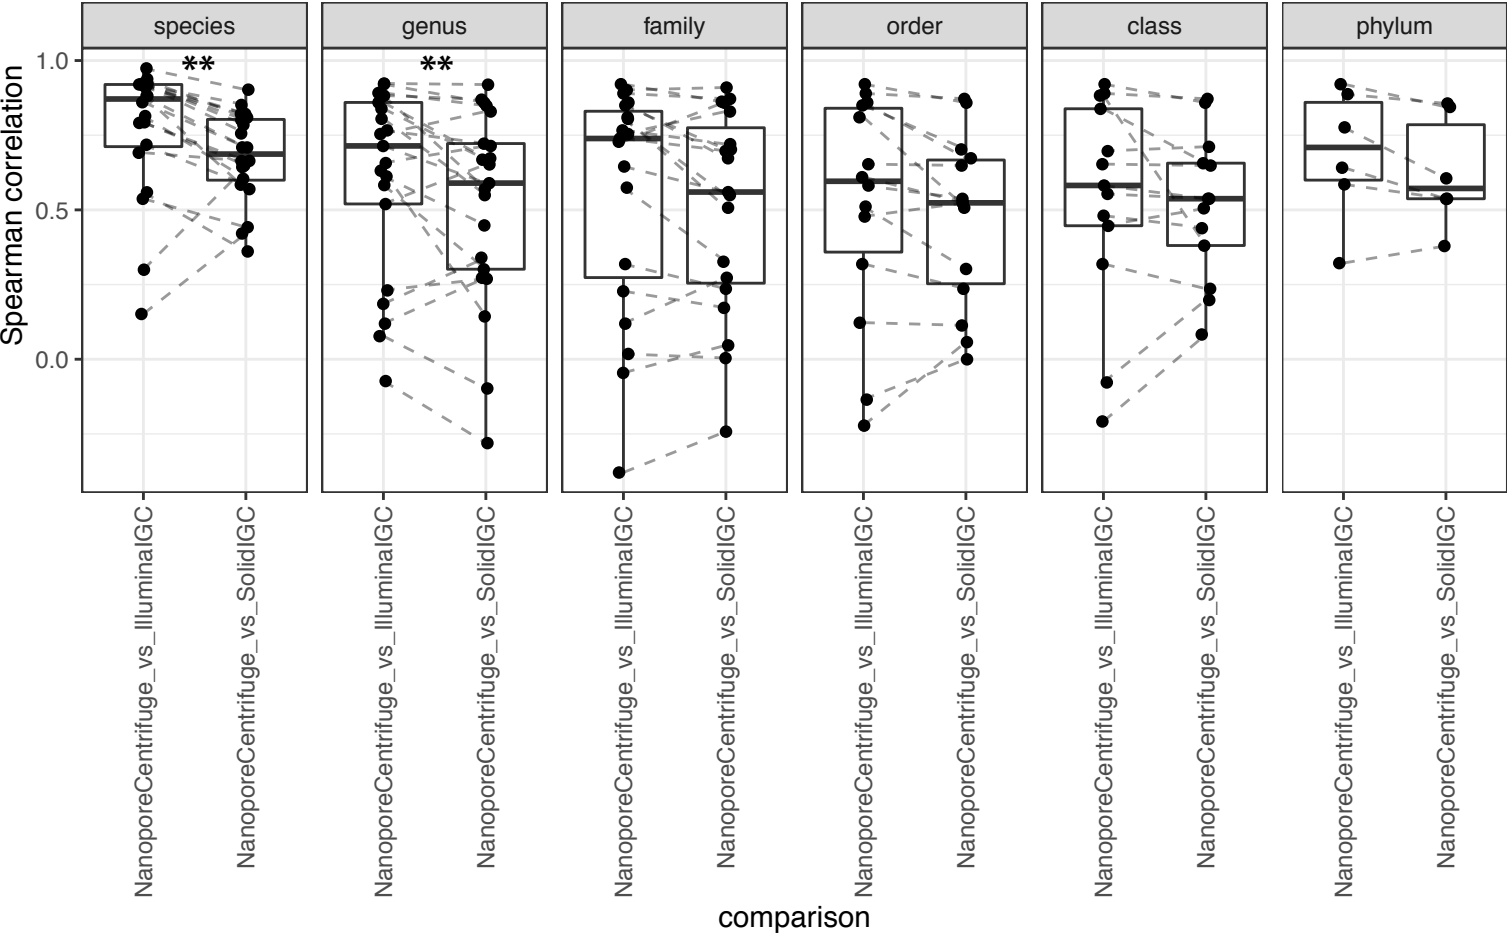

**b**

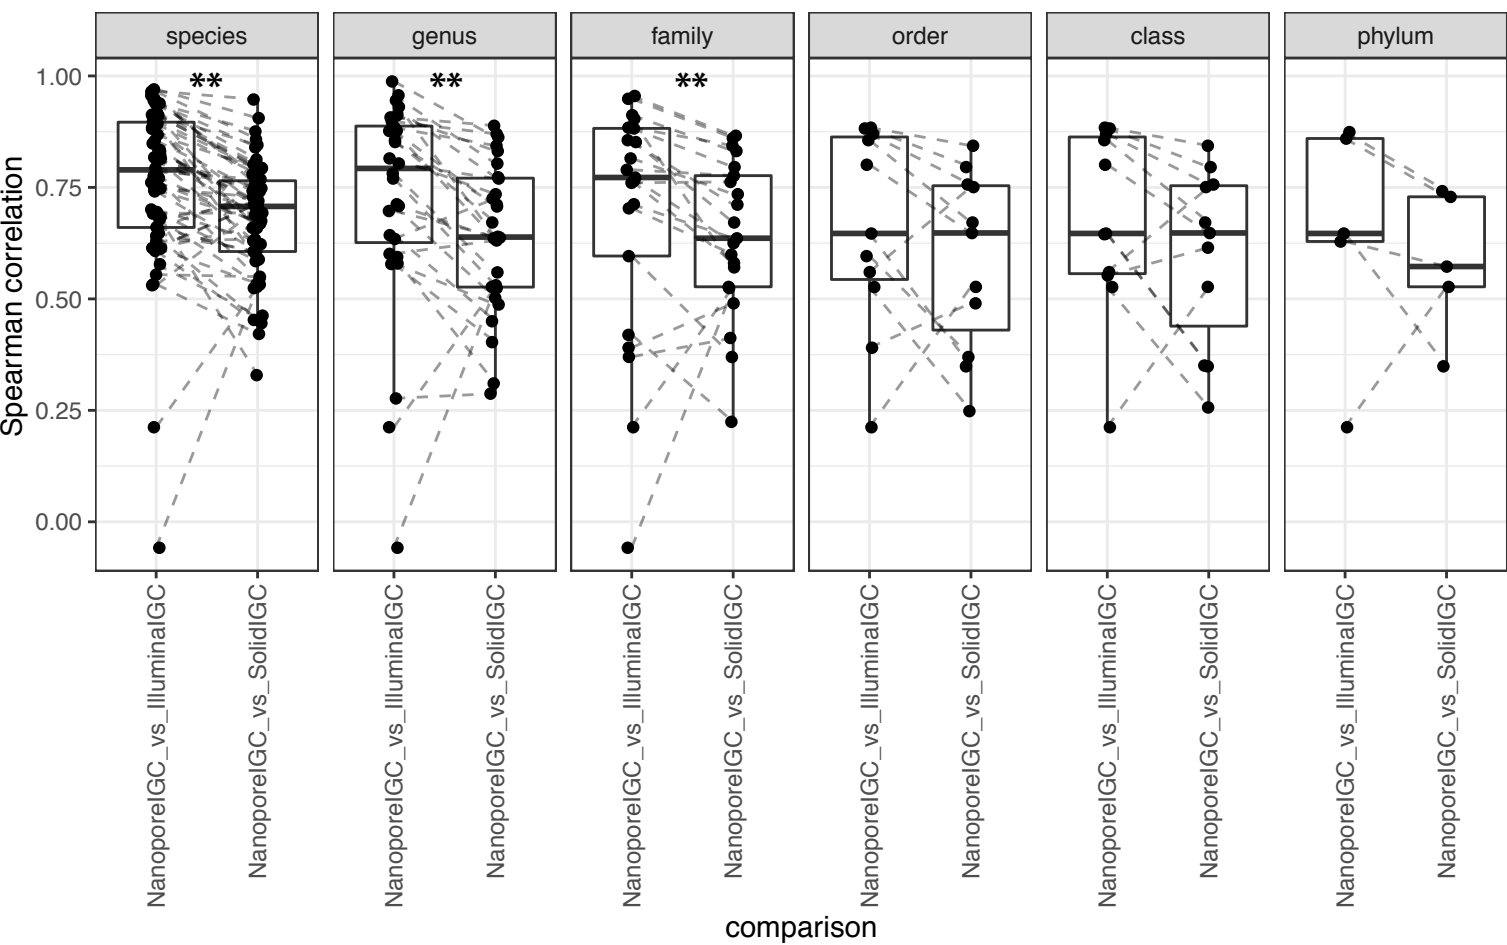

Supplement: Supplementary file 6 [file supplementary]

# Additional file S7

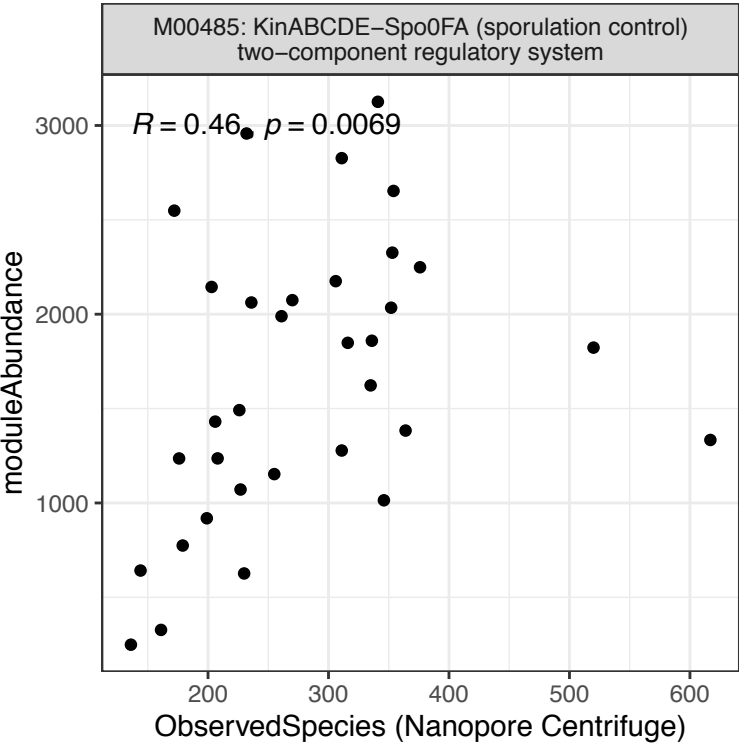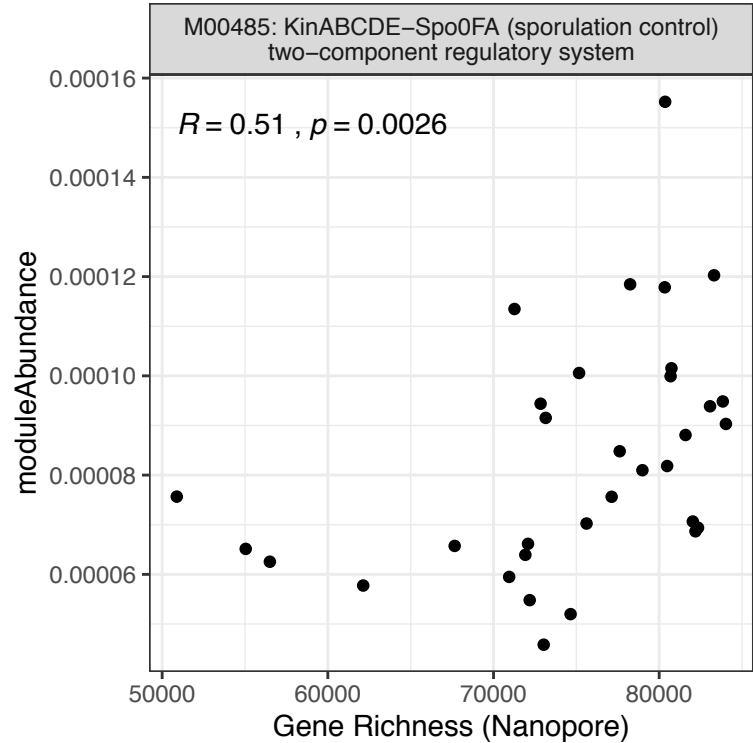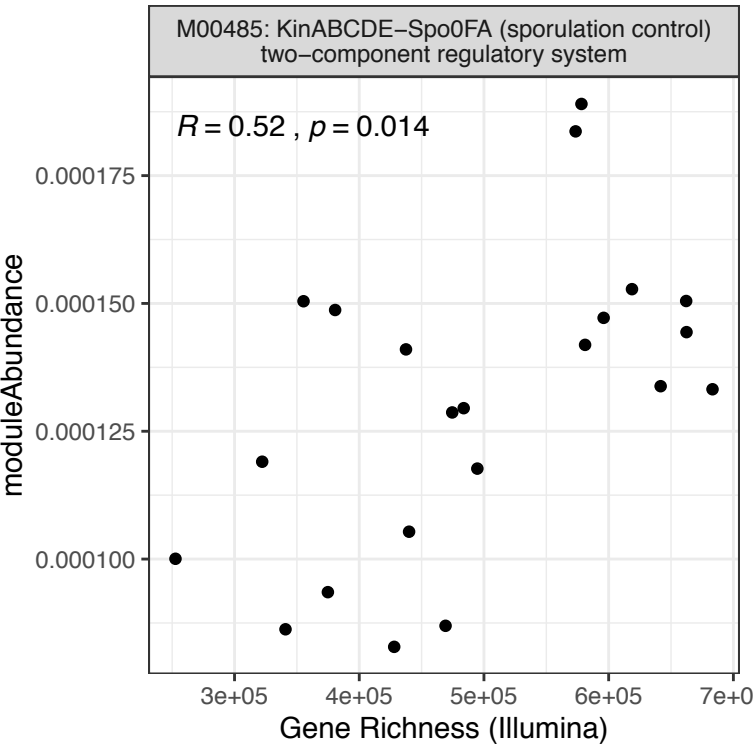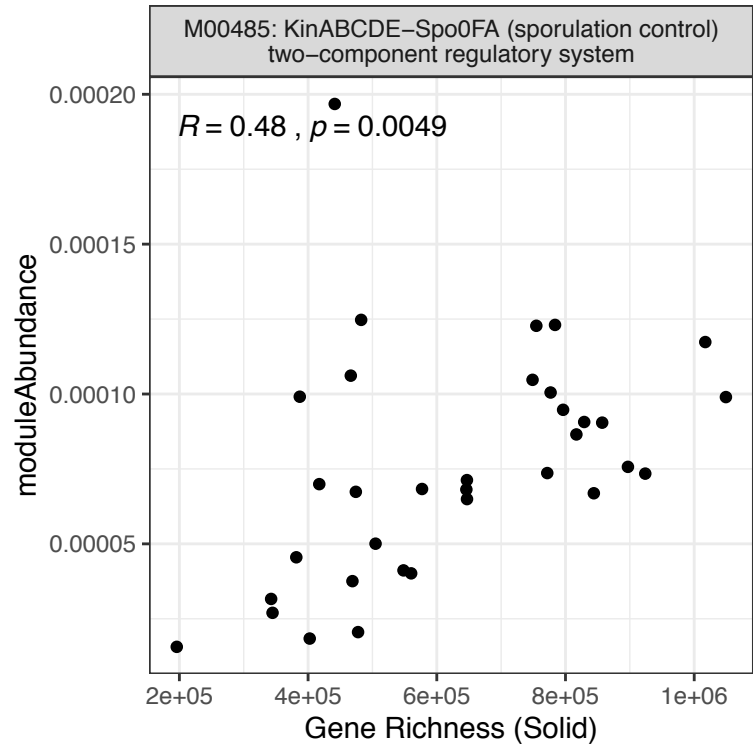

Supplement: Supplementary file 9 [file supplementary]

# Additional file S6

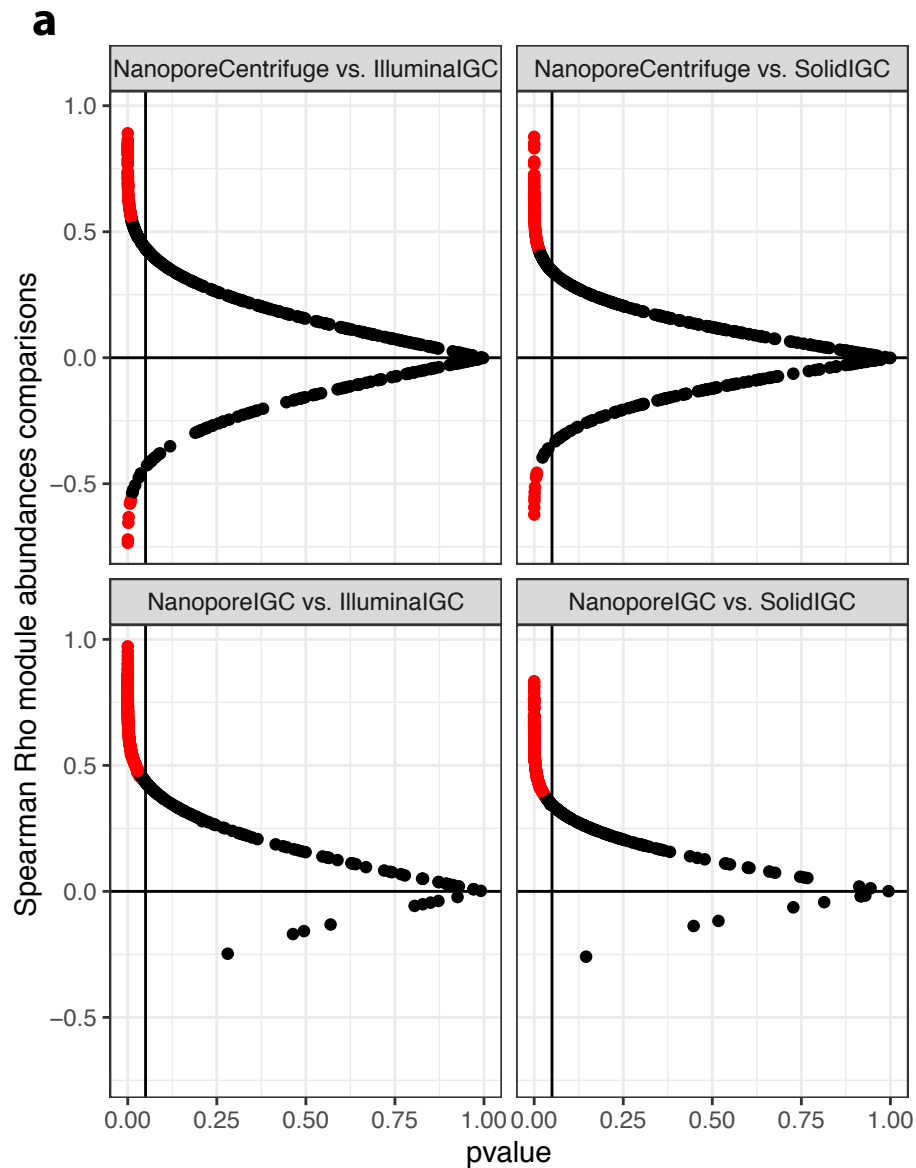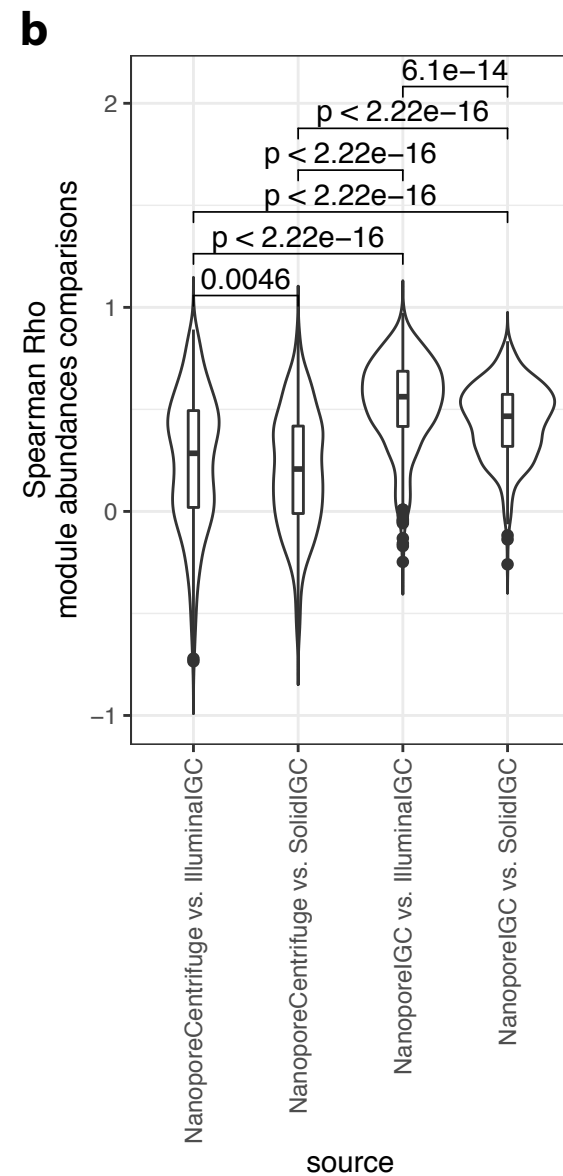

Supplement: Supplementary file 10 [file supplementary]

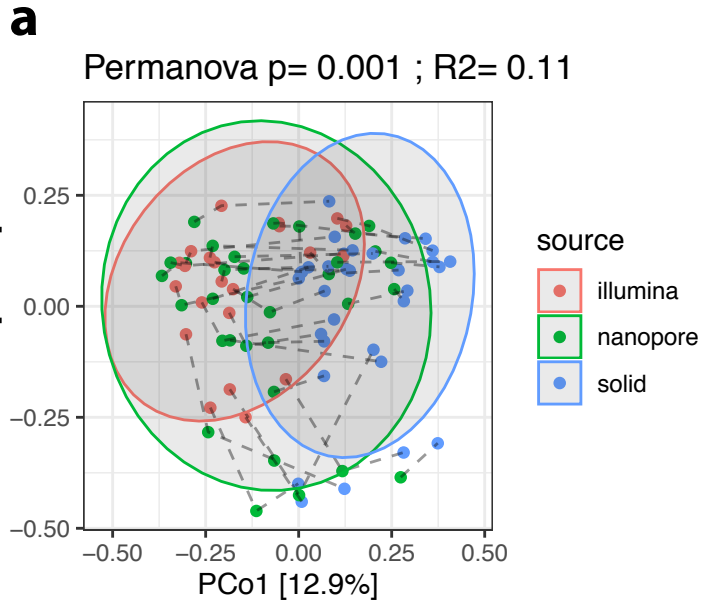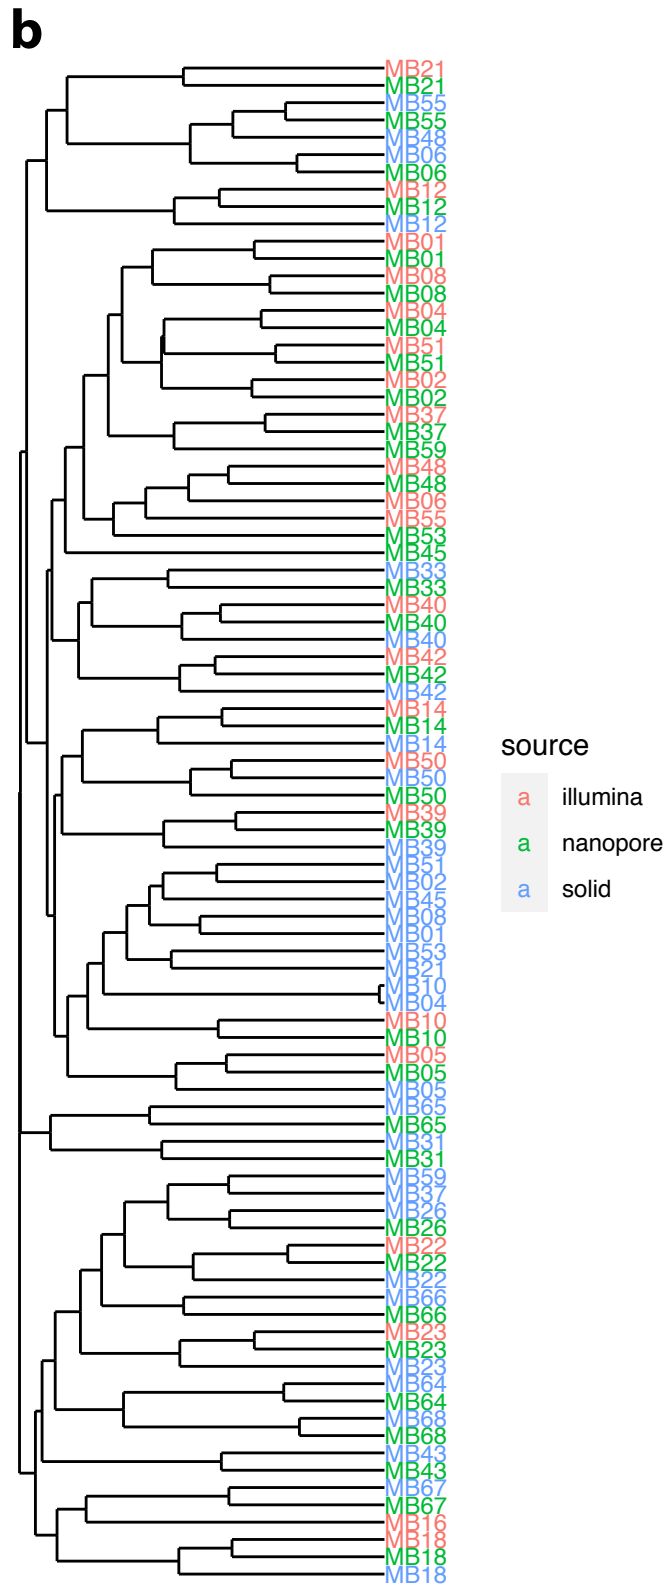

Supplement: Supplementary file 14 [file supplementary]

Additional File S1

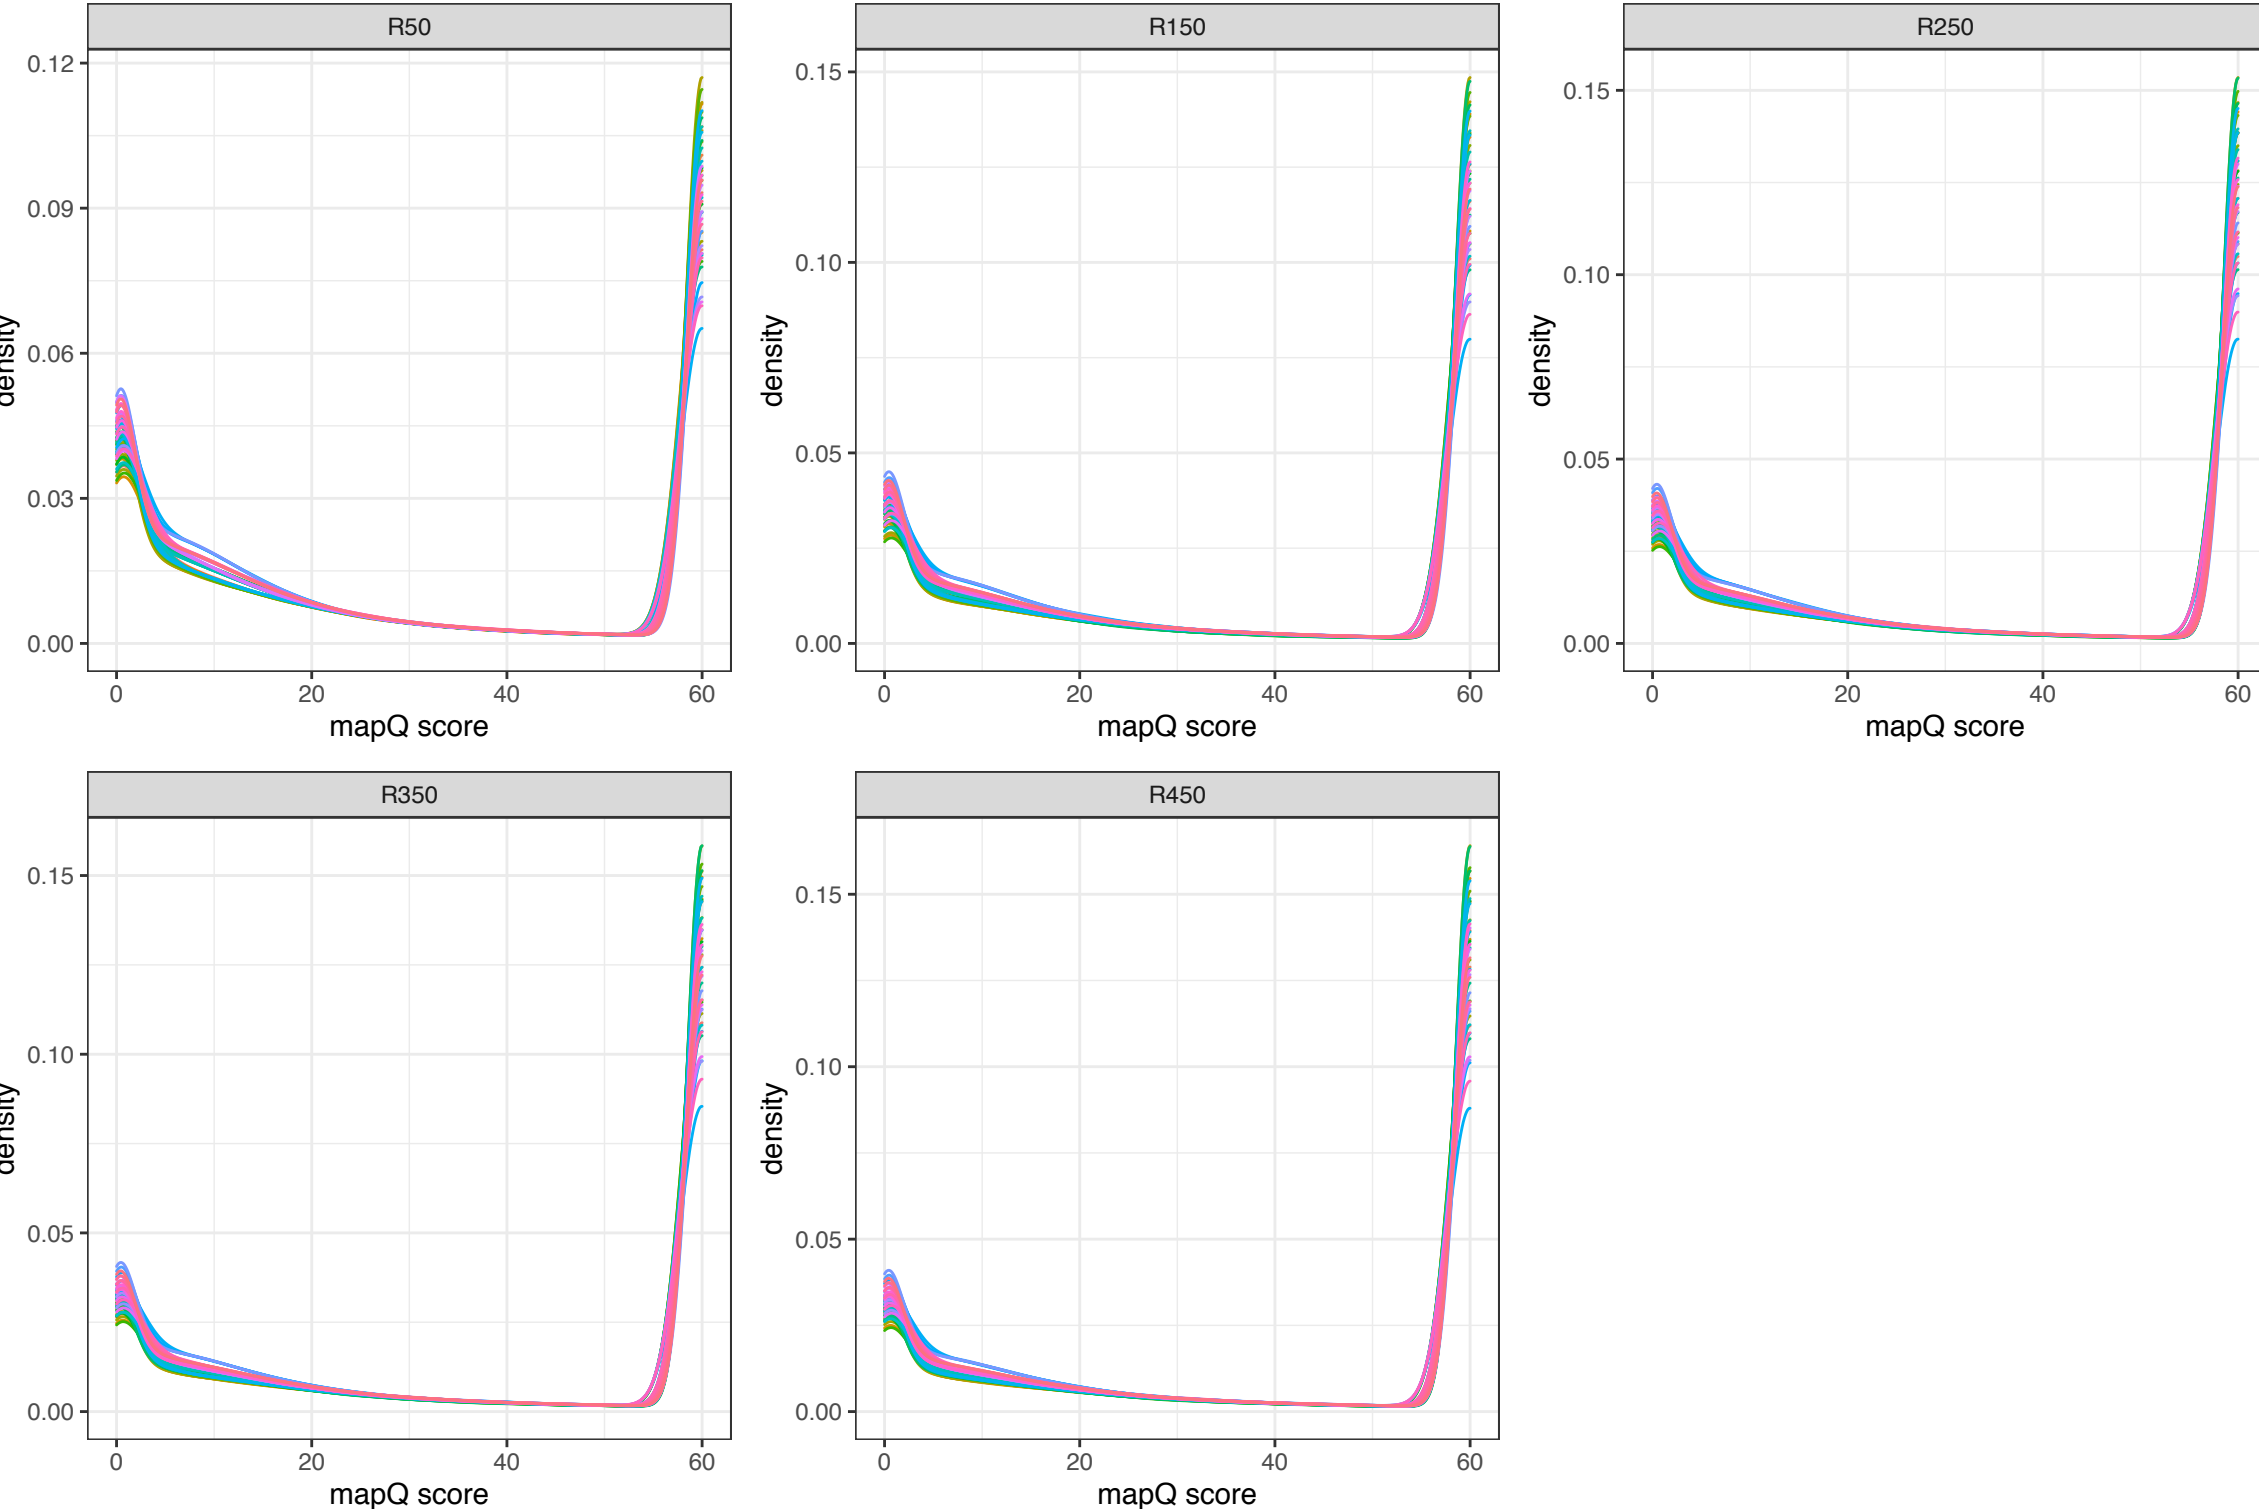

Supplement: Supplementary file 15 [file supplementary]

## Additional file S3

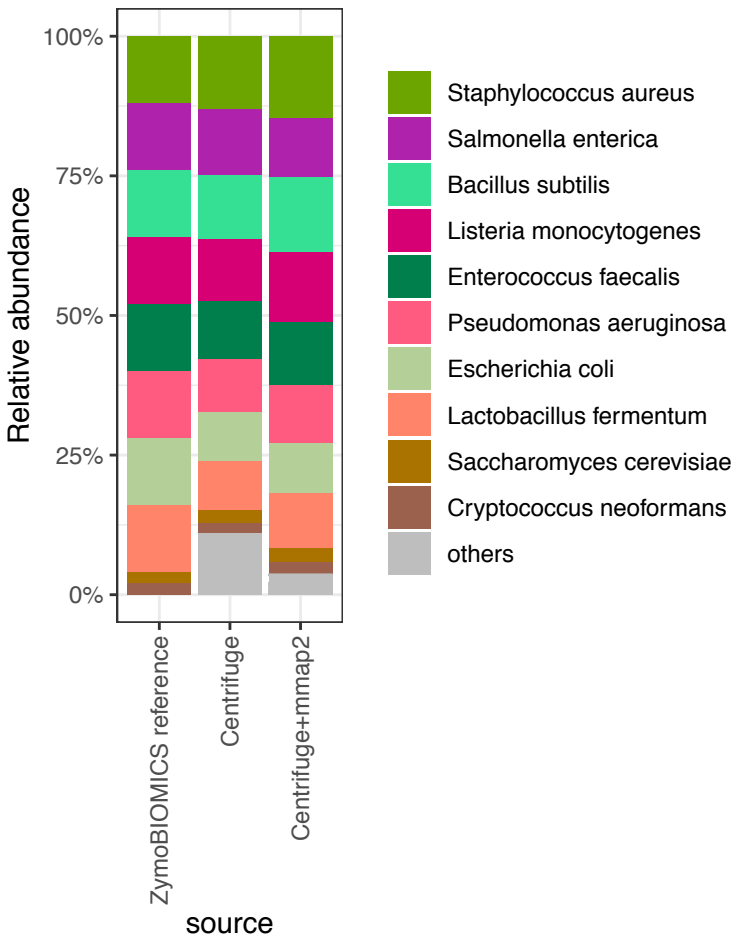

Supplement: Supplementary file 18 [file supplementary]
